# Supplementary material
Source: Springer Nature journal article supplement (https://www.springermedizin.de/resource/supplementary/12904_2008_55_MOESM2_ESM.pdf/9518044)

0 5000 10000 15000

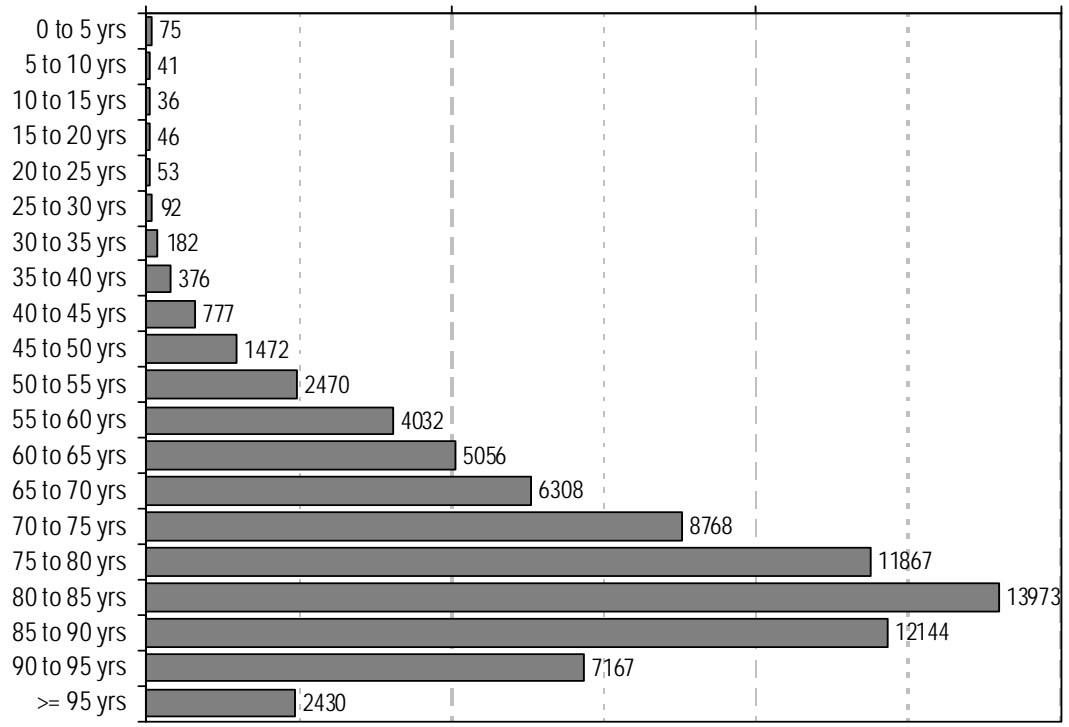

■ Number of deaths from a chronic disease in 2006 (total = 77,366)

Supplement: MOESM2 [file 9518044]
